# Supplementary material for: The Impact and Cost of Scaling up Midwifery and Obstetrics in 58 Low- and Middle-Income Countries
Source: PLOS journal article supplement (doi:10.1371/journal.pone.0098550), 2014-06-18
Supplement: S3 (10.1371/journal.pone.0098550.s003) [file journal.pone.0098550.s003]

## WebAppendix C. Additional Results

**WebTable 1. Total deaths averted by midwifery scale-up by country BEmONC coverage classification excluding family planning.**

|                                                                  | Baseline Coverage of Midwifery Interventions, including BEmONC |                    |                  |                 |                    |
|------------------------------------------------------------------|----------------------------------------------------------------|--------------------|------------------|-----------------|--------------------|
|                                                                  | Very Low                                                       | Low                | Intermediate     | High            | All                |
| <b>Baseline Deaths</b>                                           | 1,439,000                                                      | 4,295,000          | 624,000          | 350,000         | 6,709,000          |
| <b>Deaths Averted with Modest (60%) Scale-up of Midwifery</b>    | 300,000<br>(21%) <sup>1</sup>                                  | 728,000<br>(17%)   | 108,000<br>(17%) | 42,000<br>(12%) | 1,178,000<br>(18%) |
| <b>Deaths Averted with Universal (99%) Scale-up of Midwifery</b> | 546,000<br>(38%)                                               | 1,455,000<br>(34%) | 213,000<br>(34%) | 97,000<br>(28%) | 2,311,000<br>(34%) |

<sup>1</sup>Percent reduction from no change scenario.

**Web Table 2. Costs per death averted by mortality type, provider type, and scope of practice.**

| Scenario                         |                                 | Maternal Deaths |                    | Stillbirths    |                    | Neonatal Deaths |                    | Total Deaths   |                    |
|----------------------------------|---------------------------------|-----------------|--------------------|----------------|--------------------|-----------------|--------------------|----------------|--------------------|
|                                  |                                 | Deaths Averted  | Cost/death Averted | Deaths Averted | Cost/death Averted | Deaths Averted  | Cost/death Averted | Deaths Averted | Cost/death Averted |
| <b>Excluding Family Planning</b> | <b>Midwives</b>                 | 161,500         | \$75,200           | 700,300        | \$20,400           | 1,449,100       | \$8,400            | 2,311,000      | \$5,300            |
|                                  | <b>Obstetricians</b>            | 255,400         | \$91,800           | 1,308,300      | \$17,900           | 1,200,200       | \$19,500           | 2,763,900      | \$8,500            |
|                                  | <b>Midwives + Obstetricians</b> | 255,400         | \$54,100           | 1,308,100      | \$10,600           | 1,902,700       | \$7,300            | 3,466,200      | \$4,000            |
| <b>Including Family Planning</b> | <b>Midwives</b>                 | 263,800         | \$32,100           | 1,364,900      | \$6,200            | 2,235,300       | \$3,800            | 3,864,100      | \$2,200            |
|                                  | <b>Obstetricians</b>            | 272,200         | \$49,200           | 1,452,400      | \$9,200            | 1,476,200       | \$9,100            | 3,200,800      | \$4,200            |
|                                  | <b>Midwives + Obstetricians</b> | 318,200         | \$30,700           | 1,773,800      | \$5,500            | 2,517,100       | \$3,900            | 4,609,200      | \$2,100            |
